# Supplementary material
Source: MDPI journal article supplement (https://www.mdpi.com/2073-4441/12/11/2996)
Supplement: s1 [file s1]

## Supplementary Material

# Optimizing Laboratory Investigations of Saline Intrusion by Incorporating Machine Learning Techniques

Georgios Etsias <sup>1,\*</sup>, Gerard A. Hamill <sup>1</sup>, Eric M. Benner <sup>1</sup>, Jesús F. Águila <sup>1</sup>, Mark C. McDonnell <sup>1</sup>, Raymond Flynn <sup>1</sup> and Ashraf A. Ahmed <sup>2</sup>

<sup>1</sup> School of Natural and Built Environment, Queen's University Belfast, Belfast BT9 5AG, UK

<sup>2</sup> College of Engineering, Design and Physical Sciences, Brunel University, London UB8 3PH, UK

\* Correspondence: g.etsias@qub.ac.uk

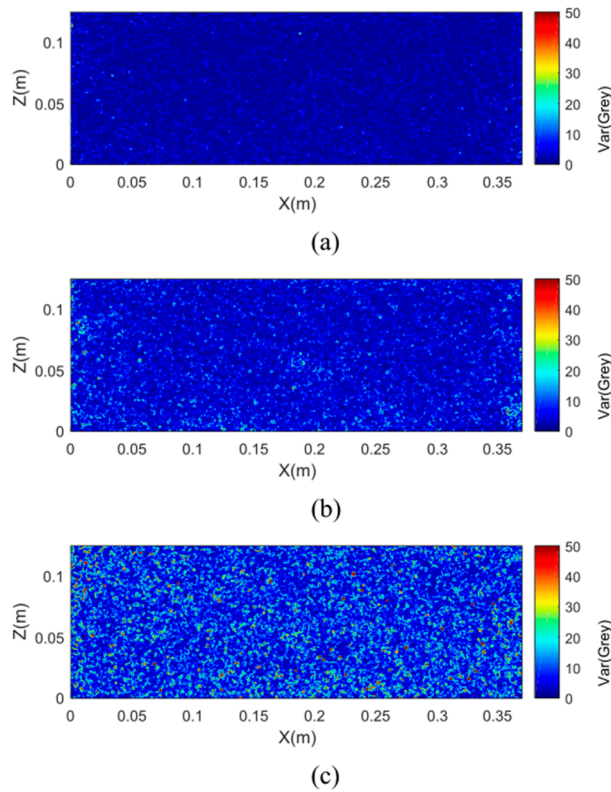

**Figure S1.** Grayscale light intensity variance of 15-by-15 pixel neighborhood in the (a) 780  $\mu\text{m}$ , (b) 1090  $\mu\text{m}$ , and (c) 1325  $\mu\text{m}$  homogeneous aquifers.

**Table S1.** Training time of the investigated machine learning techniques.

| Model                 | Training Time (min) |
|-----------------------|---------------------|
| ANN                   | 30                  |
| LDA                   | 2                   |
| QDA                   | 2                   |
| Medium KNN            | 20                  |
| Fine KNN              | 10                  |
| Boosted Tree Ensemble | 180                 |
| Random Forests        | 390                 |

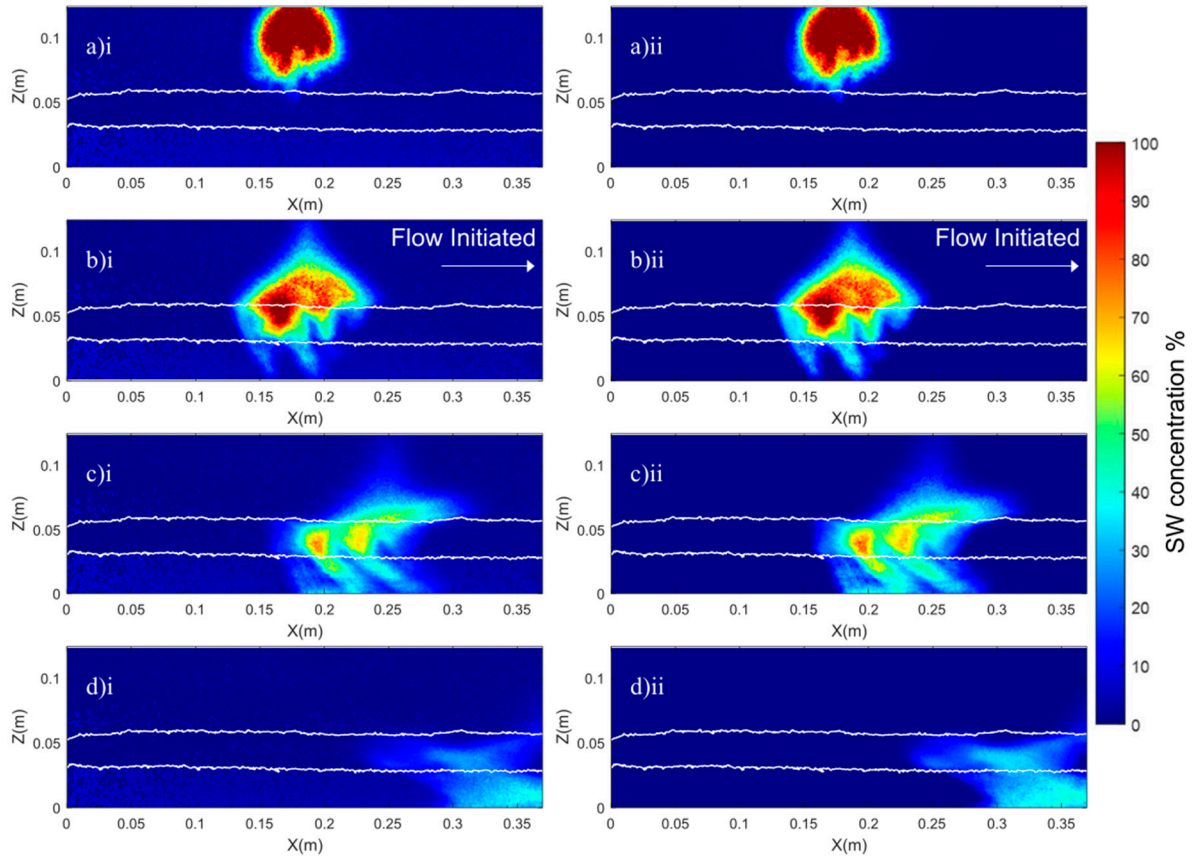

**Figure S2.** Saltwater concentration fields generated by (i) pixel wise regression (left) and (ii) the proposed ML technique (right), (a) two (b) five (c) nine and (d) fifteen minutes after the injection of saltwater in Layered3 heterogeneous aquifer.
